# Supplementary material for: Structural basis for two-step glucose trimming by glucosidase II involved in ER glycoprotein quality control
Source: PubMed Central journal article supplement (PMC4742823; doi:10.1038/srep20575), 2016-02-05
Supplement: srep20575-s1.pdf [file srep20575-s1.pdf]

## Supplemental information

### Structural basis for two-step glucose trimming by glucosidase II involved in ER glycoprotein quality control

Tadashi Satoh<sup>1,2,\*</sup>, Takayasu Toshimori<sup>1,3</sup>, Gengwei Yan<sup>1,3,4</sup>, Takumi Yamaguchi<sup>1,3,4</sup>, and Koichi Kato<sup>1,3,4,\*</sup>

<sup>1</sup>Graduate School of Pharmaceutical Sciences, Nagoya City University, 3-1 Tanabe-dori, Mizuho-ku, Nagoya 467-8603, Japan; <sup>2</sup>JST, PRESTO, 3-1 Tanabe-dori, Mizuho-ku, Nagoya 467-8603, Japan; <sup>3</sup>Okazaki Institute for Integrative Bioscience and Institute for Molecular Science, National Institutes of Natural Sciences, 5-1 Higashiyama, Myodaiji, Okazaki, Aichi 444-8787, Japan; <sup>3</sup>Okazaki Institute for Integrative Bioscience and Institute for Molecular Science, National Institutes of Natural Sciences, 5-1 Higashiyama, Myodaiji, Okazaki, Aichi 444-8787, Japan; <sup>4</sup>School of Physical Sciences, SOKENDAI (The Graduate University for Advanced Studies), 5-1 Higashiyama, Myodaiji, Okazaki, Aichi 444-8787, Japan

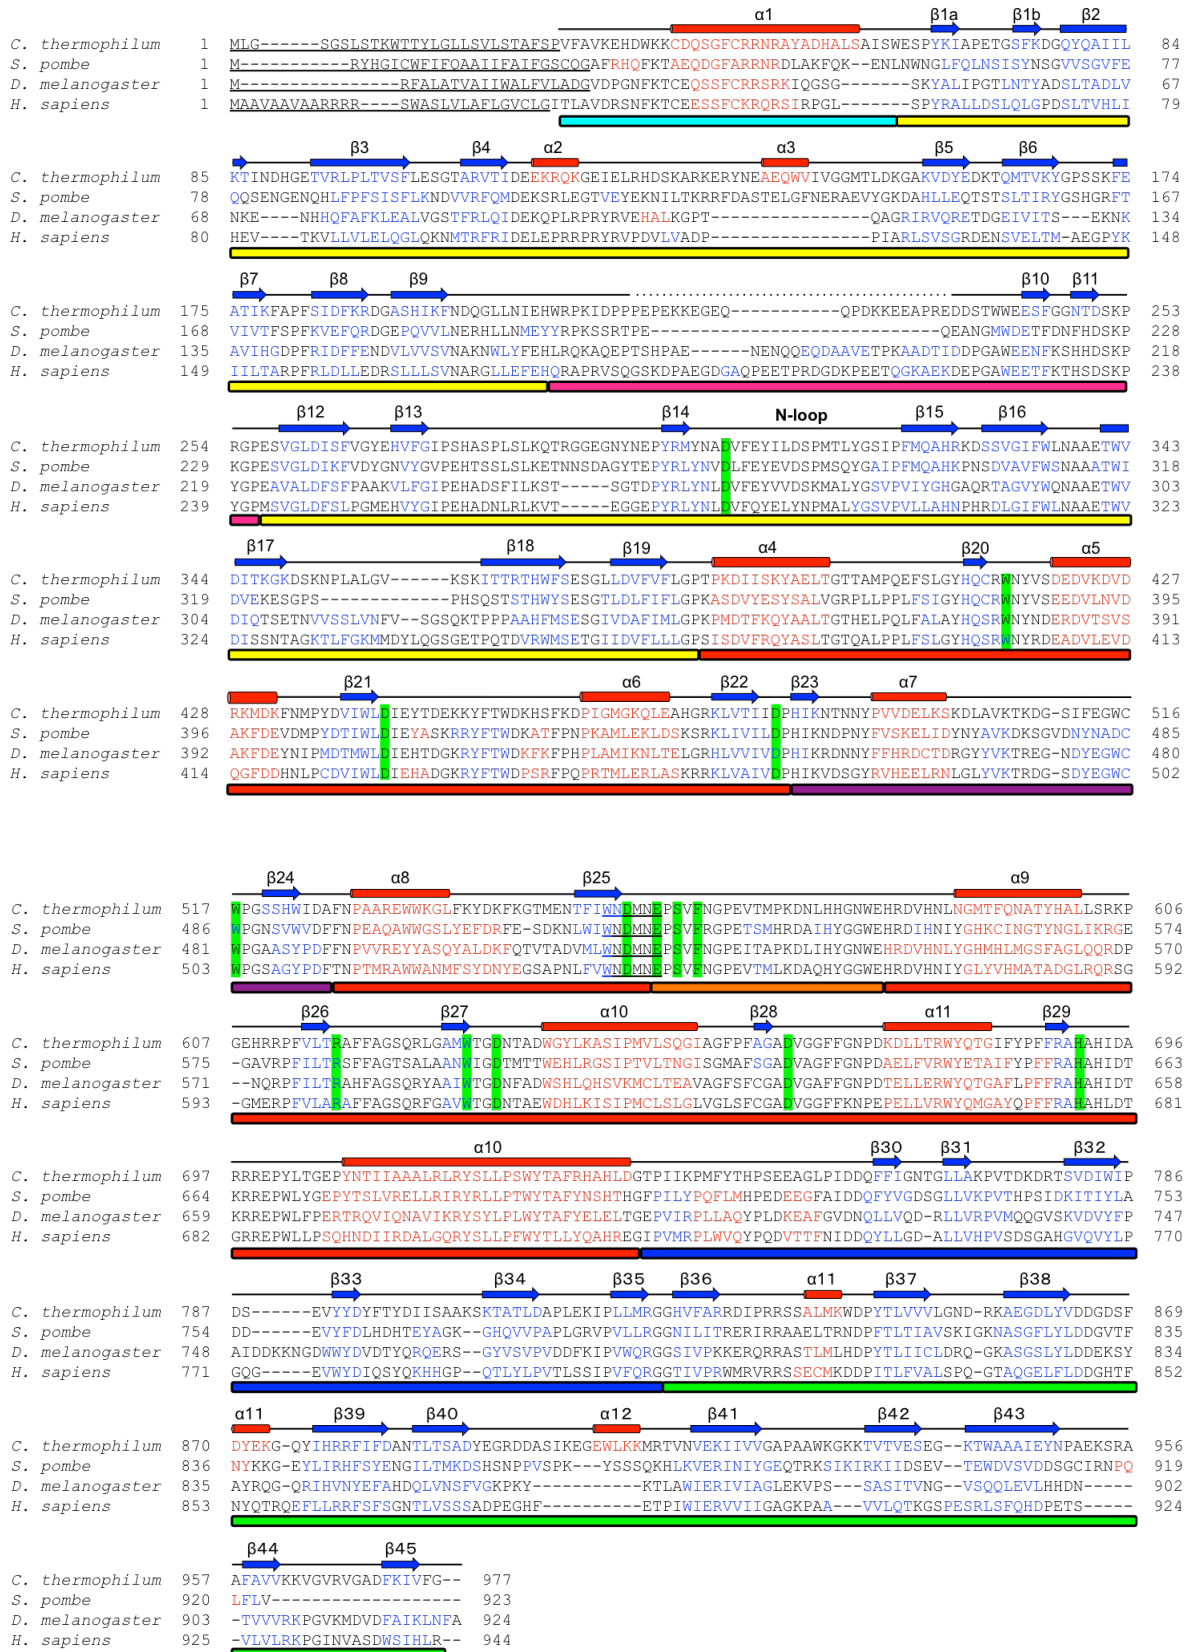

**Figure S1. Structure-based sequence alignment of GII $\alpha$  across species.** The amino acid sequences of GII $\alpha$  from fungi to human are aligned using the program PROMALS3D. The predicted secondary structure elements are colored in red ( $\alpha$  helix) and blue ( $\beta$  strand). Residues involved in substrate binding are highlighted in green. Signal peptide and WiDMNE motif are underlined. Domain structures are indicated as bar representations and colored as in Figure 1b.

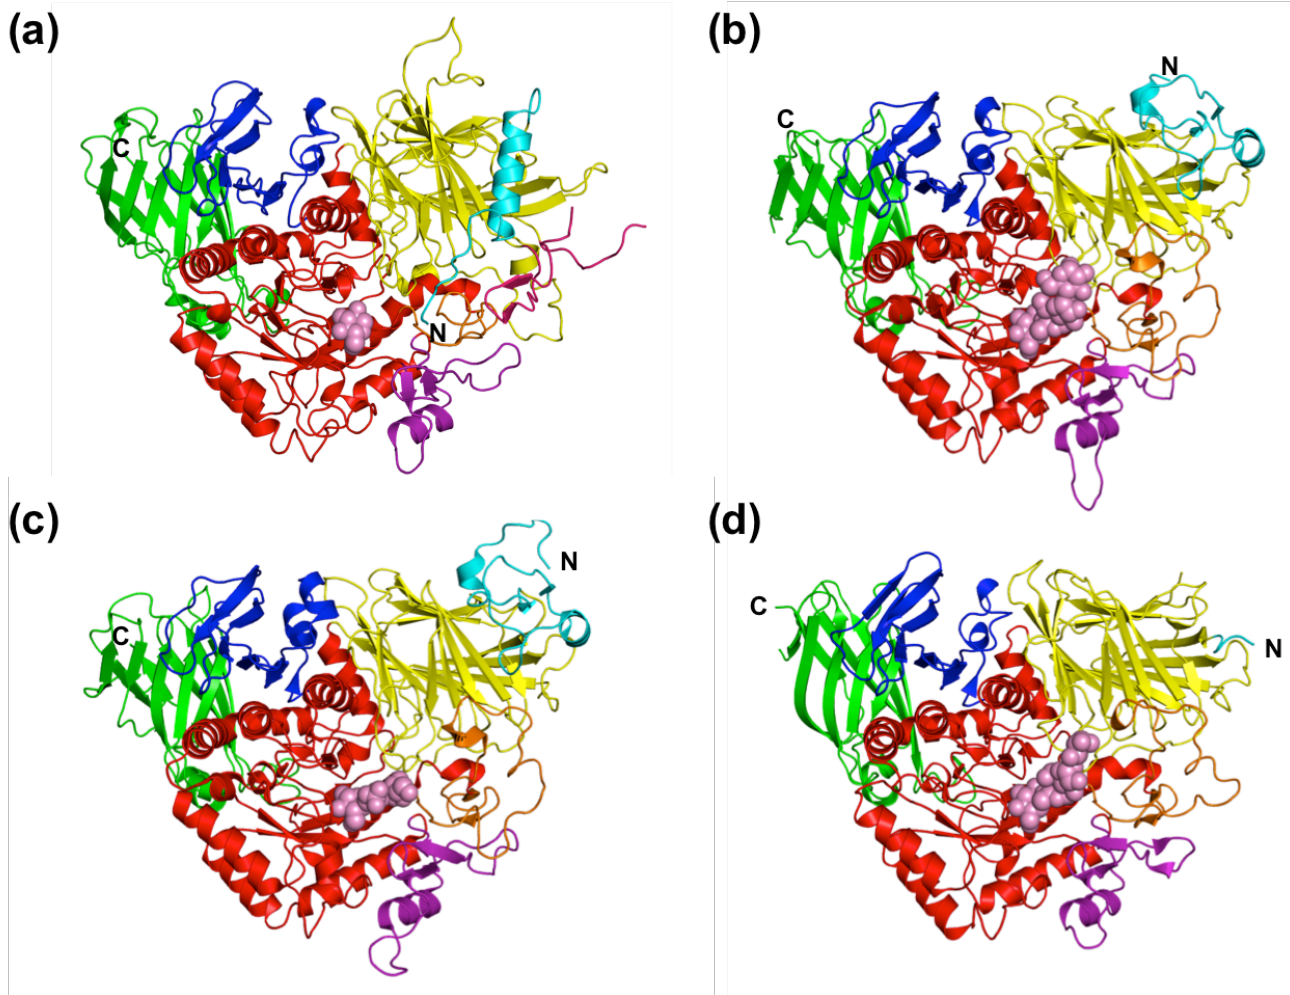

**Figure S2. GII $\alpha$  has a characteristic N-terminal domain containing the N-terminal segment and subdomain B1.** Comparison of GII $\alpha$  with other GH31  $\alpha$ -glucosidases, shown as ribbon models: (a) GII $\alpha$  (DNJ-bound form), (b) N-terminal domain of maltase-glucoamylase (PDB code: 2QMJ), (c) N-terminal domain of sucrase-isomaltase (PDB code: 3LPP), (d) sugar beet  $\alpha$ -glucosidase (PDB code: 3W37). The bound inhibitors are shown as pink spheres.

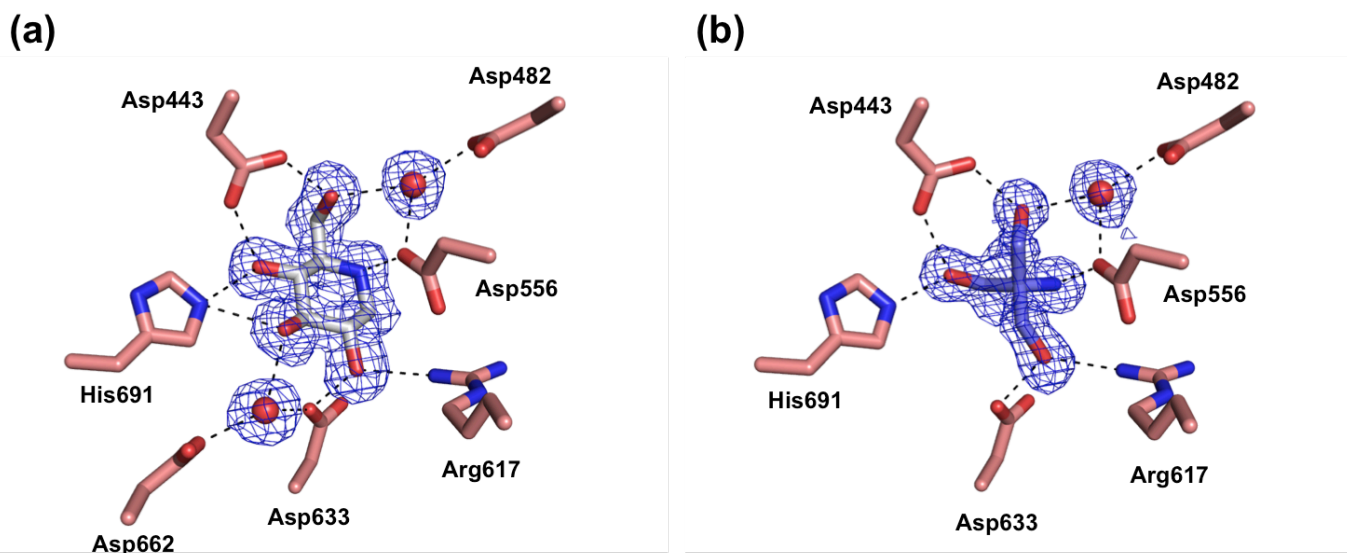

**Figure S3. Inhibitor-binding site of GIIa.** Omit  $F_o - F_c$  electron density map of DNJ, Tris, and bound water molecules contoured at  $2.0 \sigma$ . Bound inhibitors and residues involved in binding are shown in stick models: (a) DNJ-bound form, (b) Tris-bound form. Water molecules are shown in sphere models. Dashed lines indicate potential hydrogen bonds.

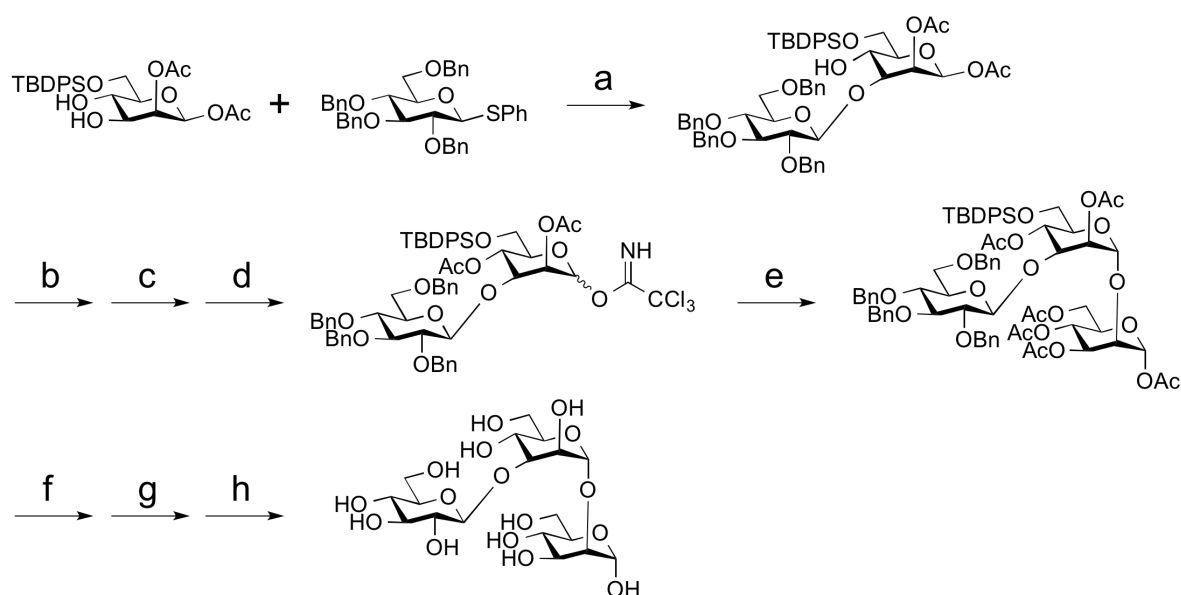

**Figure S4. Synthesis of Glc- $\alpha$ 1,3-Man- $\alpha$ 1,2-Man.** a) NIS, TfOH,  $\text{CH}_2\text{Cl}_2$ ,  $-40^\circ\text{C}$ , 2 h, 31%. b)  $\text{Ac}_2\text{O}$ , pyridine, r.t. 12 h, 74%. c)  $\text{H}_2\text{NNH}_2 \cdot \text{AcOH}$ , DMF,  $50^\circ\text{C}$ , 4 h, 47%. d)  $\text{CCl}_3\text{CN}$ ,  $\text{Cs}_2\text{CO}_3$ ,  $\text{CH}_2\text{Cl}_2$ , r.t. 3 h, 93%. e) 1,3,4,6-tetra-*O*-acetyl- $\beta$ -D-mannopyranose, TMSOTf,  $\text{CH}_2\text{Cl}_2$ ,  $-40^\circ\text{C}$ , 2 h then  $-15^\circ\text{C}$ , 0.5h, 47%. f) TBAF, AcOH, r.t. 12 h, 72%. g)  $\text{CH}_3\text{ONa}$ ,  $\text{CH}_3\text{OH}$ , r.t. 12 h, 74%. h)  $\text{H}_2/\text{Pd}(\text{OH})_2$ ,  $\text{CH}_3\text{OH}$ ,  $\text{H}_2\text{O}$ , r.t. 12 h, 43%.

NIS: *N*-iodosuccinimide, TfOH: triflic acid, DMF: *N,N*-dimethylformamide, TMSOTf: trimethylsilyl trifluoromethanesulfonate, TBAF: tetrabutylammonium fluoride.
